# Supplementary material for: NKG2A is a late immune checkpoint on CD8 T cells and marks repeated stimulation and cell division
Source: PubMed Central journal article supplement (PMC9299709; doi:10.1002/ijc.33859), 2021-11-10
Supplement: IJC-150-688-s001.pdf [file IJC-150-688-s001.pdf]

# **NKG2A is a late immune checkpoint on CD8 T cells and marks repeated stimulation and cell division**

Linda Borst, Marjolein Sluijter, Gregor Sturm, Pornpimol Charoentong, Saskia J. Santegoets, Mandy van Gulijk, Marit J. van Elsas, Christianne Groeneveldt, Nadine van Montfoort, Francesca Finotello, Zlatko Trajanoski, Szymon M. Kiełbasa, Sjoerd H. van der Burg and Thorbald van Hall

## **Table of contents:**

Supplementary Table S1

Supplementary Table S2

Supplementary Figure S1

Supplementary Figure S2

Supplementary Figure S3

Supplementary Figure S4

Supplementary Figure S5

**Table S1: quality of single cell RNA sequencing (scRNA-seq) of human head/neck carcinoma samples**

| Sample ID | Total number of sequenced reads per sample <sup>a</sup> | Total number of uniquely mapped reads per sample <sup>b</sup> | Total number of called cells <sup>c</sup> | Median number (and range) of uniquely mapped reads per called cell <sup>c</sup> | Median rRNA rate (and range) per called cell <sup>c,d</sup> | Median number (and range) of detected genes per called cell <sup>c</sup> |
|-----------|---------------------------------------------------------|---------------------------------------------------------------|-------------------------------------------|---------------------------------------------------------------------------------|-------------------------------------------------------------|--------------------------------------------------------------------------|
| H68       | 145639312                                               | 12920163                                                      | 2,801                                     | 2,846 (1,237 – 45,037)                                                          | 0.24 (0.01 - 0.45)                                          | 1,490 (740 – 6,241)                                                      |
| H188      | 228929000                                               | 190873981                                                     | 2,063                                     | 2,654 (1,206 – 38,909)                                                          | 0.25 (0.01 - 0.43)                                          | 1,421 (727 – 4,787)                                                      |
| H208      | 465578498                                               | 388028467                                                     | 2,284                                     | 3,498 (1,154 – 64,179)                                                          | 0.21 (0.02 - 0.45)                                          | 1,753 (766 – 6,586)                                                      |
| H185      | 197694189                                               | 173702555                                                     | 1,912                                     | 2,608 (1,237 – 42,851)                                                          | 0.19 (0.02 - 0.45)                                          | 1,458 (723 – 5,294)                                                      |
| H197      | 267169605                                               | 239072927                                                     | 1,908                                     | 2,908 (1,317 – 57,924)                                                          | 0.11 (0.00 - 0.34)                                          | 1,500 (736 – 7,681)                                                      |
| H176      | 253092503                                               | 219588089                                                     | 1,611                                     | 2,725 (1,217 – 51,914)                                                          | 0.21 (0.01 - 0.39)                                          | 1,528 (736 – 5,502)                                                      |
| H160      | 220886238                                               | 196941914                                                     | 3,191                                     | 2,423 (1,222 – 60,439)                                                          | 0.24 (0.02 - 0.38)                                          | 1,337 (709 – 7,301)                                                      |
| H149      | 357505855                                               | 310974775                                                     | 1,131                                     | 2,472 (1,286 – 33,515)                                                          | 0.26 (0.02 - 0.44)                                          | 1,377 (787 – 4,907)                                                      |
| H211      | 356305736                                               | 308742322                                                     | 2,930                                     | 2,192 (993 – 77,325)                                                            | 0.31 (0.02 - 0.51)                                          | 1,245 (704 – 7,324)                                                      |
| H141      | 602938326                                               | 487000938                                                     | 2,966                                     | 2,362 (1,041 – 58,100)                                                          | 0.32 (0.03 - 0.54)                                          | 1,304 (708 – 7,088)                                                      |
| H182      | 286349621                                               | 252008749                                                     | 2,561                                     | 2,587 (1,165 – 43,770)                                                          | 0.24 (0.01 - 0.43)                                          | 1,408 (727 – 6,566)                                                      |
| H205      | 385387851                                               | 341106543                                                     | 1,178                                     | 2,940 (1,158 – 63,142)                                                          | 0.18 (0.02 - 0.41)                                          | 1,521 (702 – 7,983)                                                      |
| H143      | 281522477                                               | 243022789                                                     | 1,760                                     | 2,560 (1,184 – 55,511)                                                          | 0.23 (0.01 - 0.38)                                          | 1,450 (737 – 7,160)                                                      |

<sup>a</sup> Raw files were processed with cellranger 3.0

<sup>b</sup> Reference genome GRCh38

<sup>c</sup> After quality control and filtering for e.g., possible cell doublets, potential apoptotic cells.

<sup>d</sup> rRNA rate = Ratio of all reads aligned to rRNA regions to total uniquely mapped reads. Range is defined as the minimum – maximum (i.e., median (minimum – maximum)).

**Table S2: bulk RNA sequencing quality of cultured OT-1 T cells**

| Sample ID       | Total number of sequenced reads | Total number of uniquely mapped reads <sup>a</sup> | Ratio of all reads aligned to rRNA regions to total uniquely mapped reads (rRNA rate) | Ratio of exon-mapped reads to total uniquely mapped reads (Expression Profile Efficiency) | Total number of detected transcripts with reads $\geq 1$ |
|-----------------|---------------------------------|----------------------------------------------------|---------------------------------------------------------------------------------------|-------------------------------------------------------------------------------------------|----------------------------------------------------------|
| OT-1 NKG2A- no1 | 67609138                        | 42027032                                           | 0.104                                                                                 | 0.971                                                                                     | 17890                                                    |
| OT-1 NKG2A- no2 | 74461605                        | 44992992                                           | 0.119                                                                                 | 0.944                                                                                     | 22459                                                    |
| OT-1 NKG2A- no3 | 84259094                        | 54150124                                           | 0.085                                                                                 | 0.93                                                                                      | 25944                                                    |
| OT-1 NKG2A- no4 | 62477383                        | 41116967                                           | 0.119                                                                                 | 0.961                                                                                     | 19048                                                    |
| OT-1 NKG2A- no5 | 76454355                        | 49739174                                           | 0.1                                                                                   | 0.946                                                                                     | 20414                                                    |
| OT-1 NKG2A+ no1 | 24379493                        | 16874847                                           | 0.039                                                                                 | 0.947                                                                                     | 18029                                                    |
| OT-1 NKG2A+ no2 | 37249452                        | 23749289                                           | 0.116                                                                                 | 0.967                                                                                     | 17996                                                    |
| OT-1 NKG2A+ no3 | 69913322                        | 43623956                                           | 0.057                                                                                 | 0.956                                                                                     | 22061                                                    |
| OT-1 NKG2A+ no4 | 72245203                        | 45774380                                           | 0.099                                                                                 | 0.951                                                                                     | 21071                                                    |
| OT-1 NKG2A+ no5 | 69778037                        | 44215881                                           | 0.098                                                                                 | 0.911                                                                                     | 24460                                                    |

<sup>a</sup> reference genome GRCm38.96 was used.

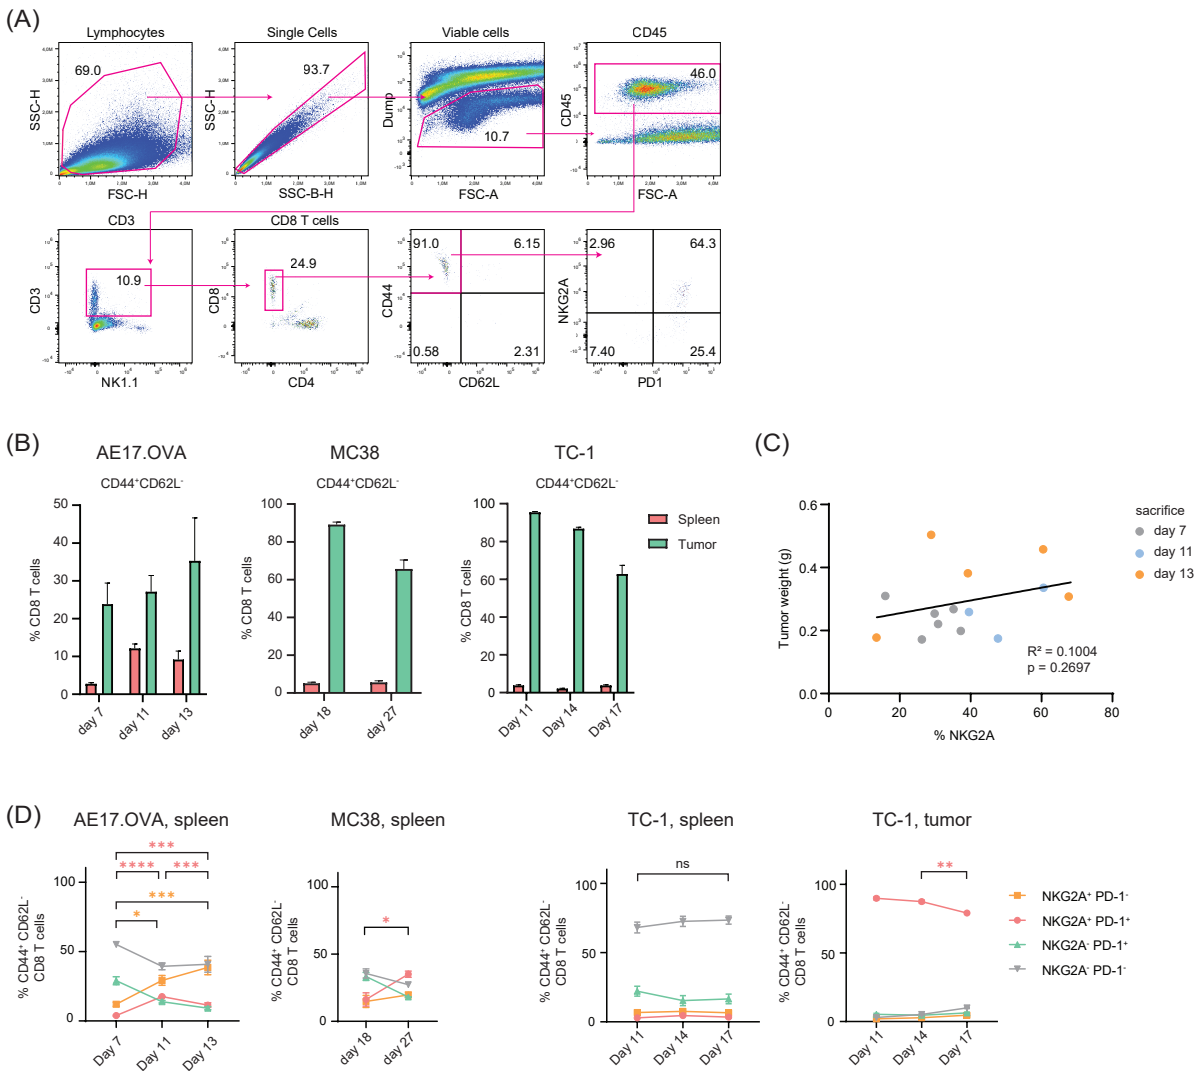

**Supplementary Figure 1.** In vivo expression of NKG2A and PD-1 on activated CD8 T cells. (A) Flow cytometry gating strategy for intratumoral and splenic CD8 T cells. (B) Proportion of activated ( $CD44^+CD62L^-$ ) CD8 T cells out of all CD8 T cells in spleen and tumor from AE17.OVA, MC38 and TC-1 tumor-bearing animals. (C) Correlation plot of tumor weight and frequency of NKG2A-expressing CD8 T cells from AE17.OVA tumor samples. (D) Frequencies of CD8 T cells expressing NKG2A and/or PD-1 from spleens of AE17.OVA, MC38 and TC-1 and in TC-1 tumors. Data are derived from minimal 6 different mice and represent mean with SEM. Four subsets were plotted over time. One-way ANOVA with Holm-Sidak's multiple comparisons test was used for statistical analysis.

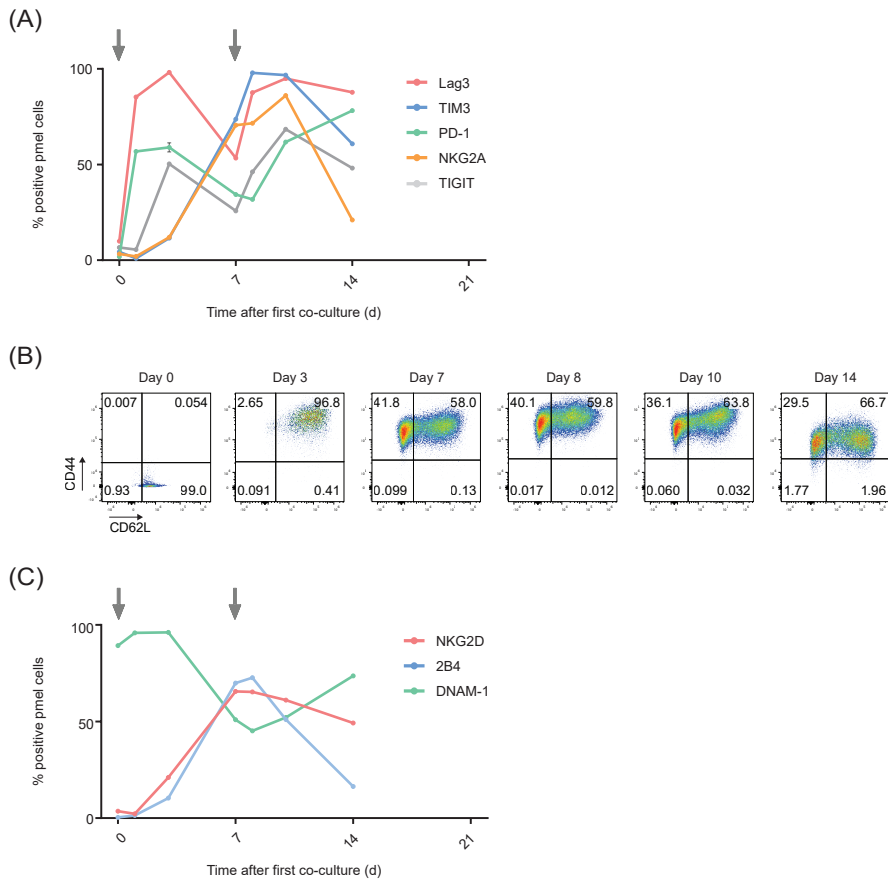

**Supplementary Figure 2.** Stimulation of naïve TCR-transgenic pmel CD8 T cells recognizing the gp100 peptide in H-2D<sup>b</sup> with peptide-pulsed dendritic cell line D1. (A) Frequencies of pmel T cells expressing the indicated inhibitory receptors over time. (B) Flow cytometry dotplots of activation markers CD44 and CD62L, showing a diverse population of pmel T cells. (C) Frequencies of pmel T cells expressing the indicated activating receptors over time.

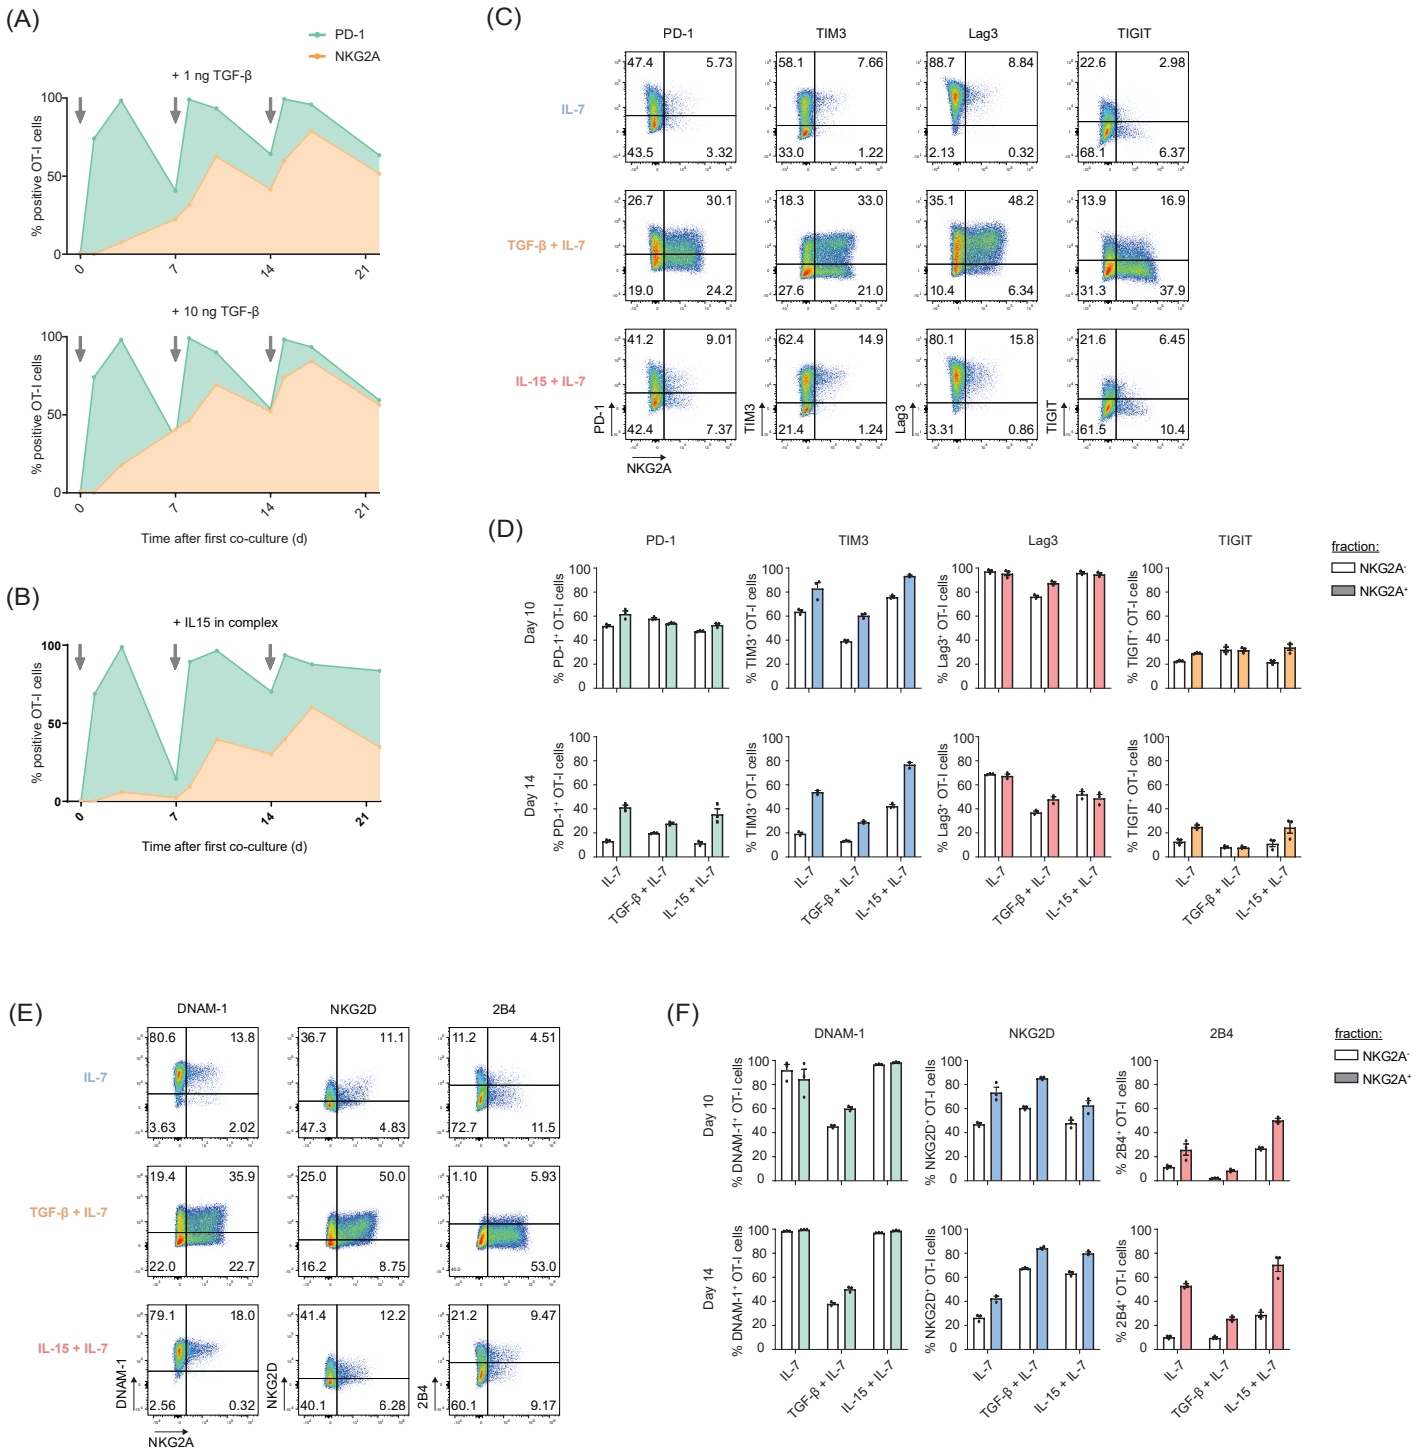

**Supplementary Figure 3.** (A) Percentages OT-I T cells displaying PD-1 and NKG2A in the presence of IL-7 and 1 ng/ml or 10 ng/ml TGF- $\beta$ . Arrows indicate OT-I stimulation with antigen expressing SAMBOK cells. (B) Percentages OT-I T cells displaying PD-1 and NKG2A in the presence of IL-7 and 50 ng/ml IL-15 with 100 ng/ml IL15-R $\alpha$ -Fc in complex. (C-D) Flow cytometric plots (C) and quantification (D) of co-expression of inhibitory receptors on OT-I T cells incubated with cytokines TGF- $\beta$  or IL-15. (E-F) Flow cytometric plots (E) and quantification (F) of co-expression of activating receptors on OT-I T cells incubated with cytokines TGF- $\beta$  or IL-15. Means and SEM of 3-5 independent experiments. Representative flow cytometry plots are from day 10.

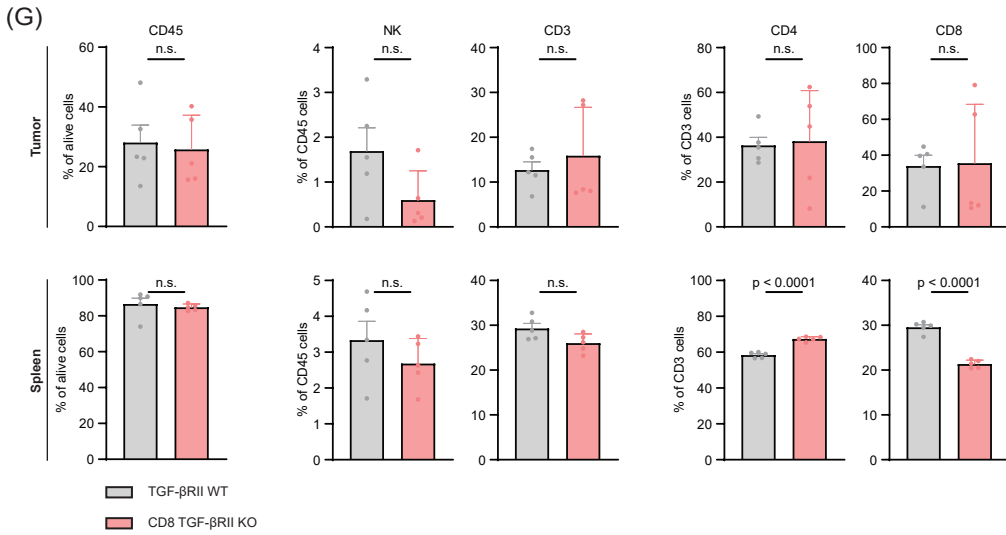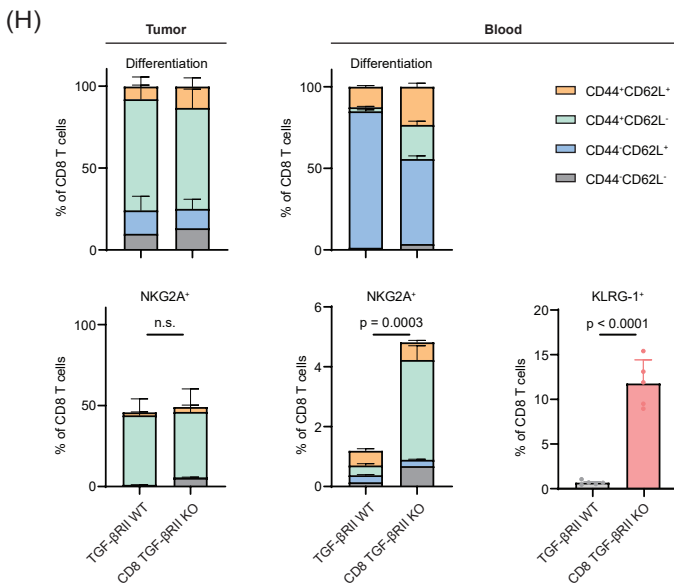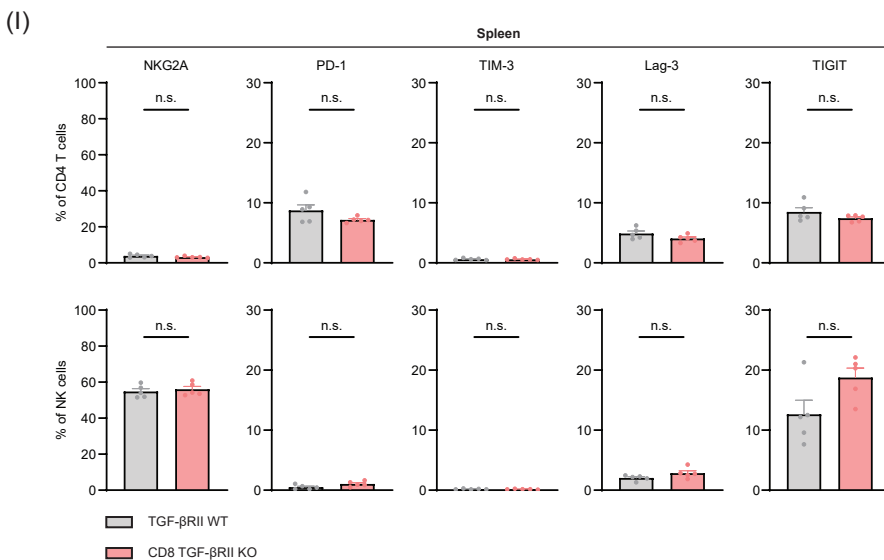

**Supplementary Figure 3.** (G-I) TGF-βRII WT and CD8 TGF-βRII KO (lacking the TGF-β receptor II selectively in CD8 T cells) mice were inoculated with KPC3 tumors. 20 days after tumor inoculation tumor, spleen and blood were harvested, dispersed and stained for flow cytometry to analyse (G) lymphocytes infiltrate, (H) differentiation state and the NKG2A expression visualized per differentiated population, (I) expression of inhibiting receptors. Data presented are means ± SEM. Unpaired Student's t test was used for statistical analysis.

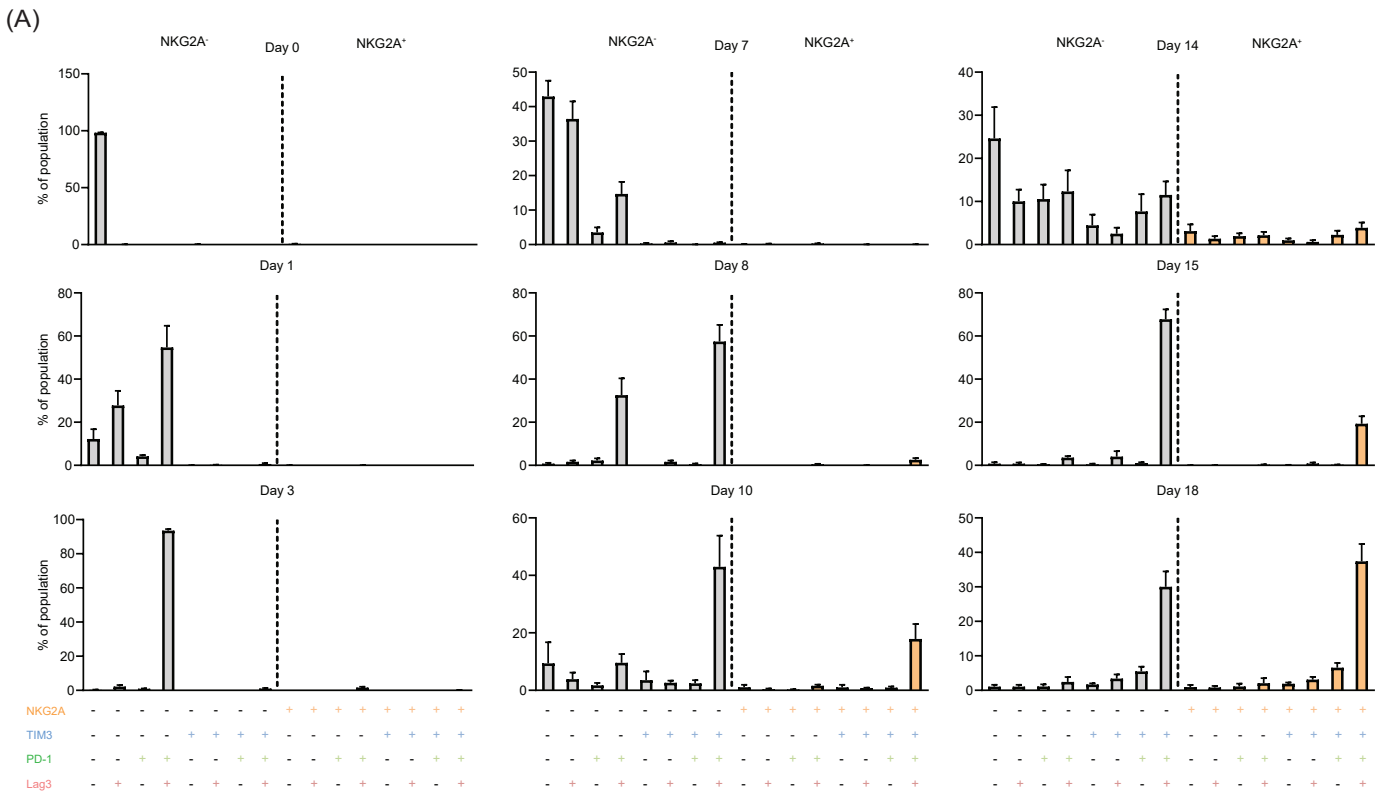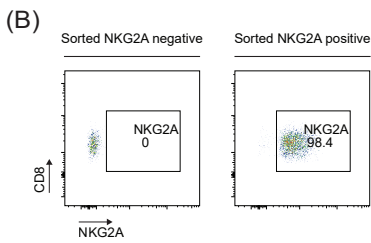

**Supplementary Figure 4.** (A) Co-expression of several inhibitory receptors on *in vitro* cultured OT-I T cells at different time points. (B) Samples from OT-I T cells from day 21 directly after FACS sorting based on NKG2A.



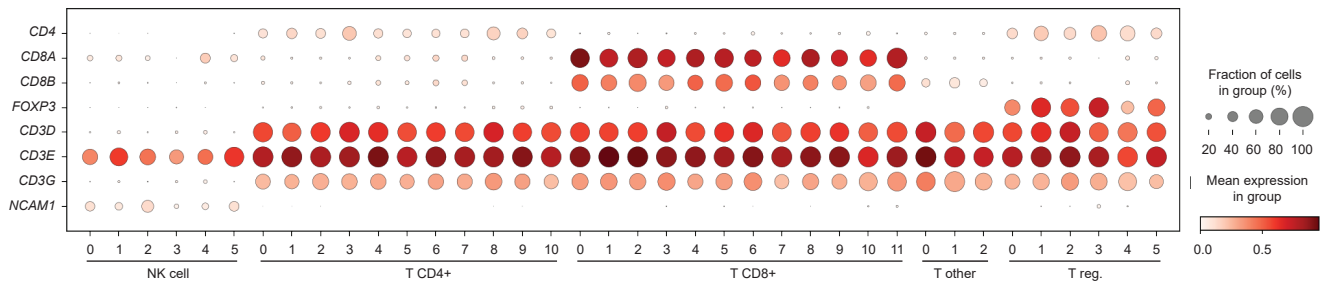

**Supplementary Figure 5.** Transcript levels of lineage markers in all clusters from single-cell transcriptomics of T cells and NK cells from oropharyngeal squamous cell carcinomas from Fig. 7.
